# Supplementary material for: Incretin-Modulated Beta Cell Energetics in Intact Islets of Langerhans
Source: PubMed Central journal article supplement (PMC4042069; doi:10.1210/me.2014-1038), 2014-04-25

**Supplementary Figure 1: Simultaneous monitoring of Ca<sup>2+</sup> and ATP in single mouse beta cells. (A)** Representative recording demonstrating that GLP-1 stimulates ATP rises before those of Ca<sup>2+</sup> (magnification inset) (*n* = 5 recordings). **(C)** As for (A) but tolbutamide as a control to stimulate large excursions in Ca<sup>2+</sup> which lead to net ATP consumption (magnification inset) (*n* = 5 recordings).

**A**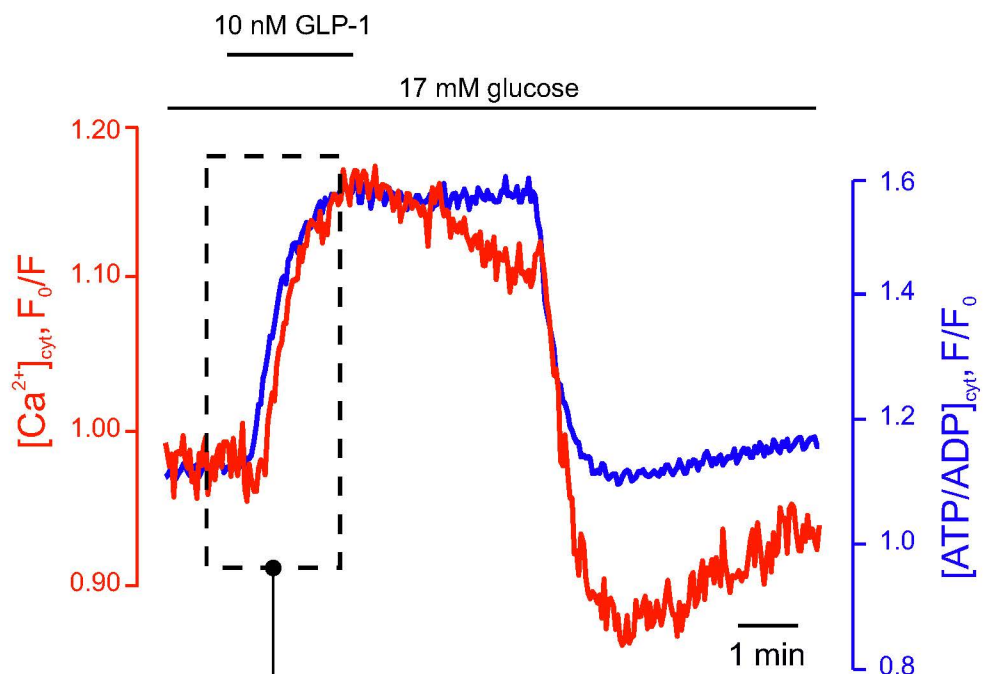**B**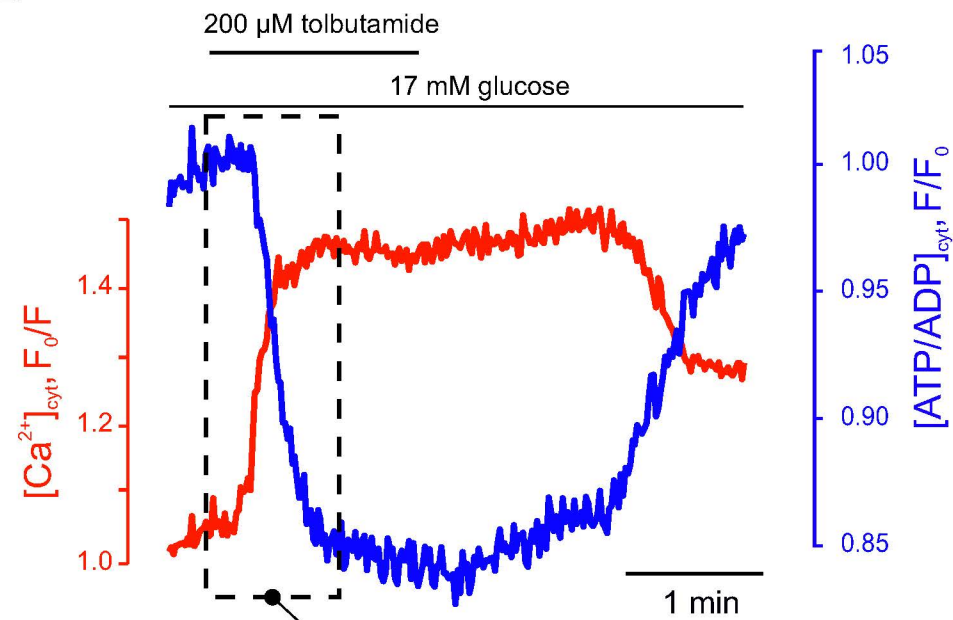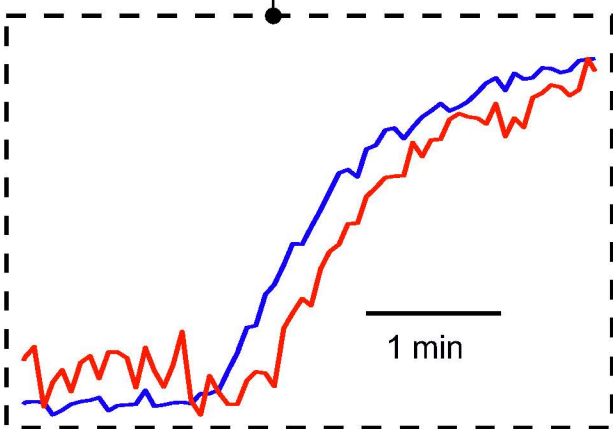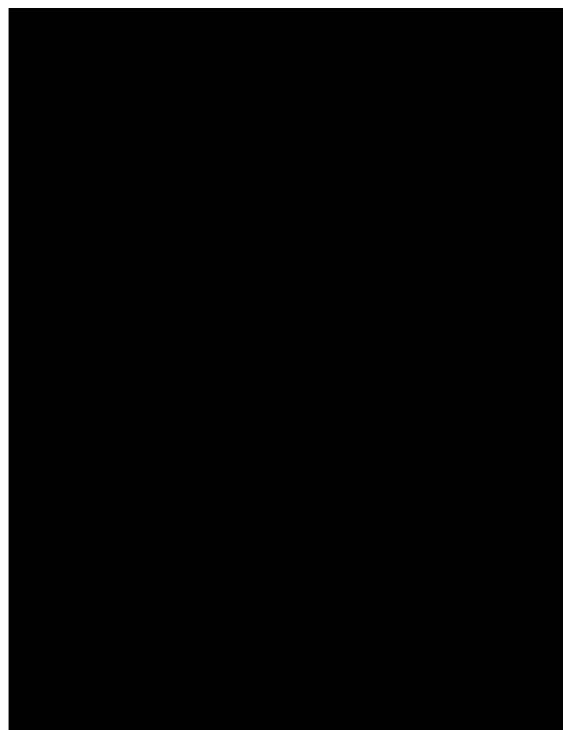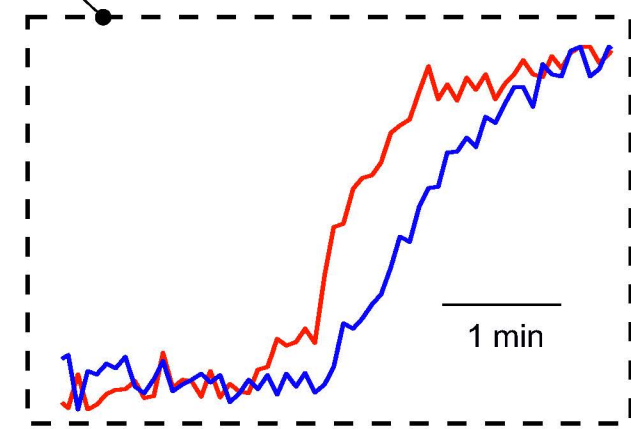

Supplement: me-14-1038.pdf [file me-14-1038.pdf]
